# Supplementary material
Source: PubMed Central journal article supplement (PMC3989670)
Supplement: embr0015-0392-sd5.pdf [file embr0015-0392-sd5.pdf]

**Fig S4 | Retromer complex is dispensable for autophagy.** (A) U2OS cells have been stably depleted for retromer subunit VPS29 using 3 different shRNA oligos, as described in Material and Methods. Control cells were stably expressing non-targeting shRNA oligo. Cells were treated with DMSO or KU0063794 for 6 hours, lysed in RIPA buffer, and lysates were subjected to SDS-PAGE. Total levels of proteins have been detected using antibodies against endogenous retromer complex subunits, ATG9A, TBC1D5, p70S6K (Thr389) and LC3. P70S6K (Thr389) was used as control for mTOR inhibition and vinculin as loading control.

**Note:** cells depleted of VPS29 to level undetectable on western blot die upon second passage, therefore experiment was performed upon first passage 4-5 days after the infection with Lentiviral particles.
