# Supplementary material
Source: PubMed Central journal article supplement (PMC3989670)
Supplement: embr0015-0392-sd6.pdf [file embr0015-0392-sd6.pdf]

# Supplementary figure 5.

## A

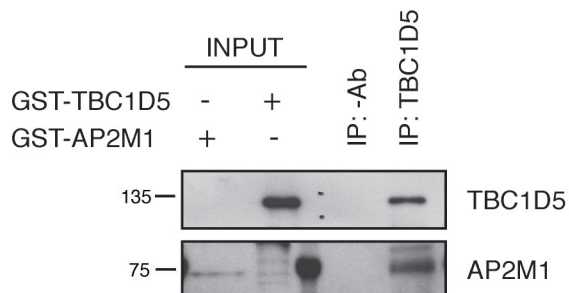

## B

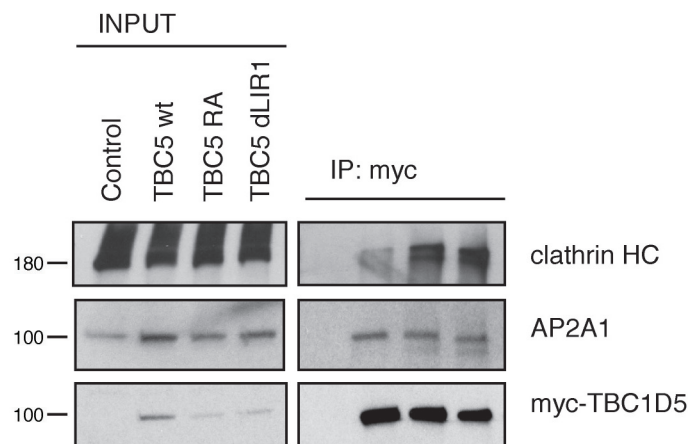

**Fig S5 | TBC1D5 interacts with AP2 complex** (A) GST tagged TBC1D5 and AP2M1 were purified from *E. Coli* as described in Material and methods. Subsequently, proteins were eluted from GSH-agarose using elution buffer (10mM reduced glutathione/ 50mM Tris-HCL pH 8.0, 150mM NaCl), and binding reactions have been prepared such that 3  $\mu$ g of each protein have been mixed in 400  $\mu$ L of co-immunoprecipitation buffer, 0,8  $\mu$ g of anti-TBC1D5 antibody was added with G-agarose in binding reaction, while antibody was omitted in control tube. After over night incubation on +4C, beads were washed 3 times with incubation buffer, boiled in 3X Laemmli loading buffer and subjected to SDS-PAGE. Blots were analyzed with anti-TBC1D5 and anti-AP2M antibodies. (B) 293T cells were transiently transfected with myc-TBC1D5 plasmids, 20 hours post-transfection cells were lysed in co-immunoprecipitation buffer and lysates were incubated with Myc-agarose (Santa Cruz) over night on +4 C. Beads were washed 3 times with incubation buffer, and subjected to SDS-PAGE.
