# Supplementary material
Source: PubMed Central journal article supplement (PMC3989670)
Supplement: embr0015-0392-sd8.pdf [file embr0015-0392-sd8.pdf]

# Supplementary figure 7.

## A

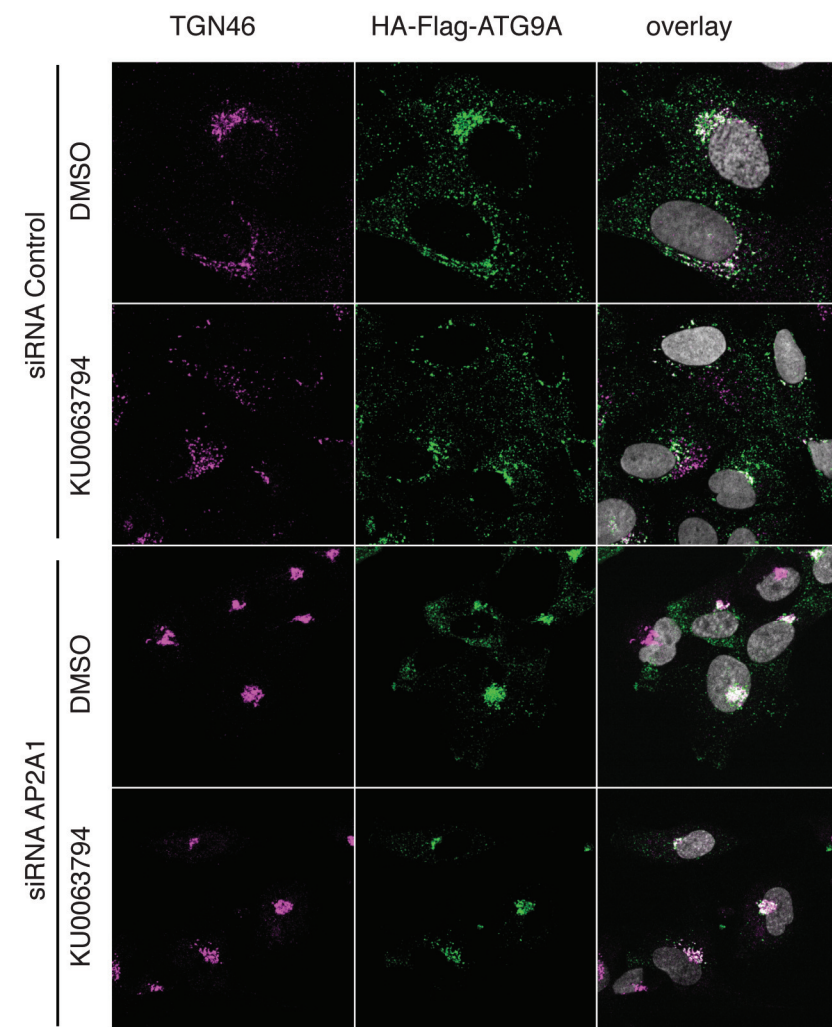

## B

|               |   |   |   |   |
|---------------|---|---|---|---|
| siRNA Control | + | - | + | - |
| siRNA AP2A1   | - | + | - | + |
| DMSO          | + | + | - | - |
| KU0063794     | - | - | + | + |

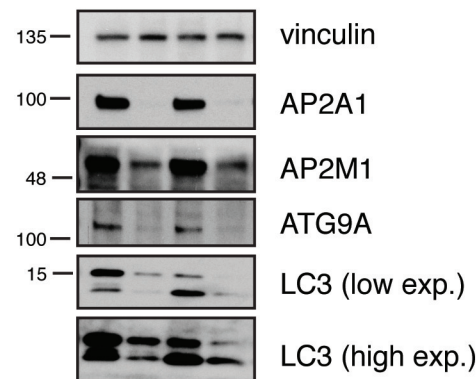

**Fig S7 | AP2 complex regulates ATG9 trafficking** (A) U2OS cells stably expressing HA-Flag-ATG9 were transfected with siRNA AllStar control oligo or siRNA oligo #1 targeting AP2 complex, in 40nM concentration. 96 hours post-transfection cells were treated with DMSO or KU0063794 for 6h, fixed and immune-labeled with anti-TGN46 and anti-HA antibody. Co-localization analysis statistics for ATG9 and TGN46 is presented in Fig 4B. (B) U2OS cells were transfected with siRNA oligos and treated as described in Fig. S5, cell lysates were prepared in RIPA buffer and subjected to SDS-PAGE. Blot was probed with respective endogenous antibodies.
