# Supplementary material
Source: PubMed Central journal article supplement (PMC3989670)
Supplement: embr0015-0392-sd9.pdf [file embr0015-0392-sd9.pdf]

# Supplementary figure 8.

## A

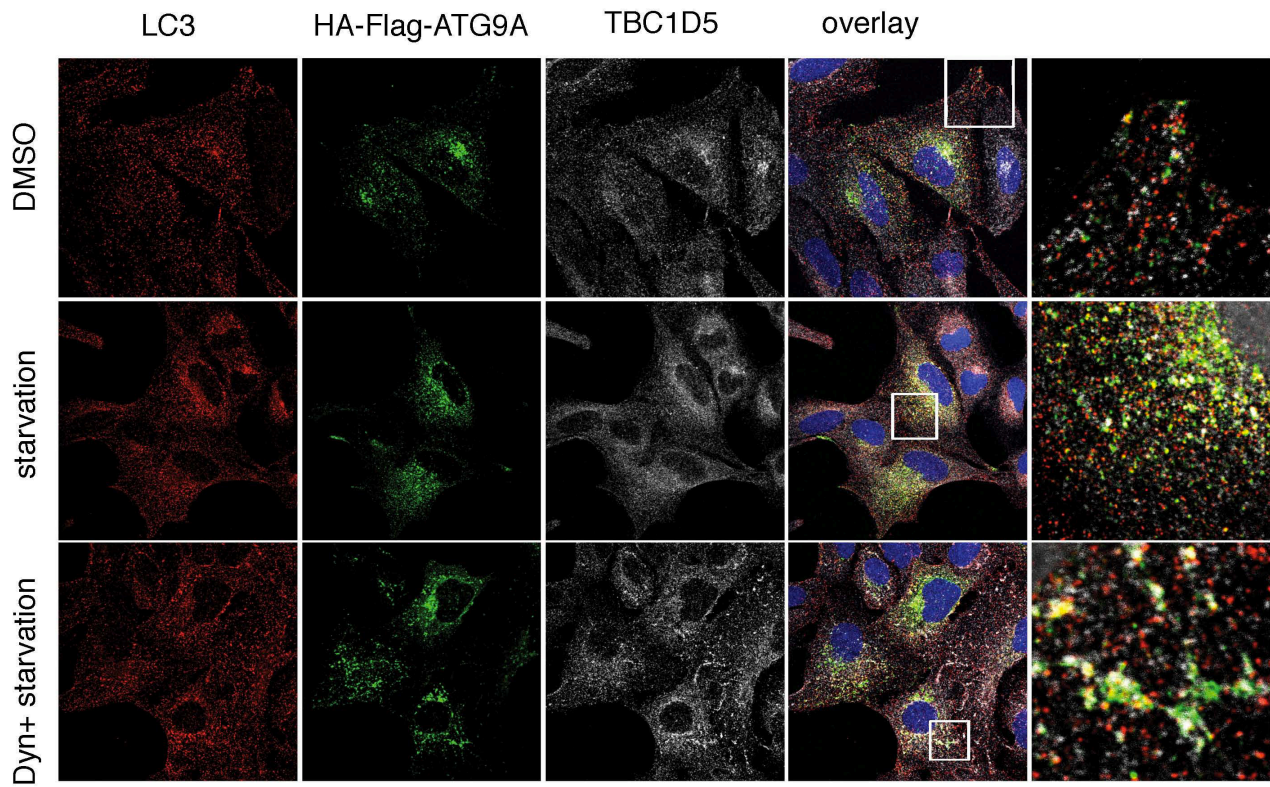

## B

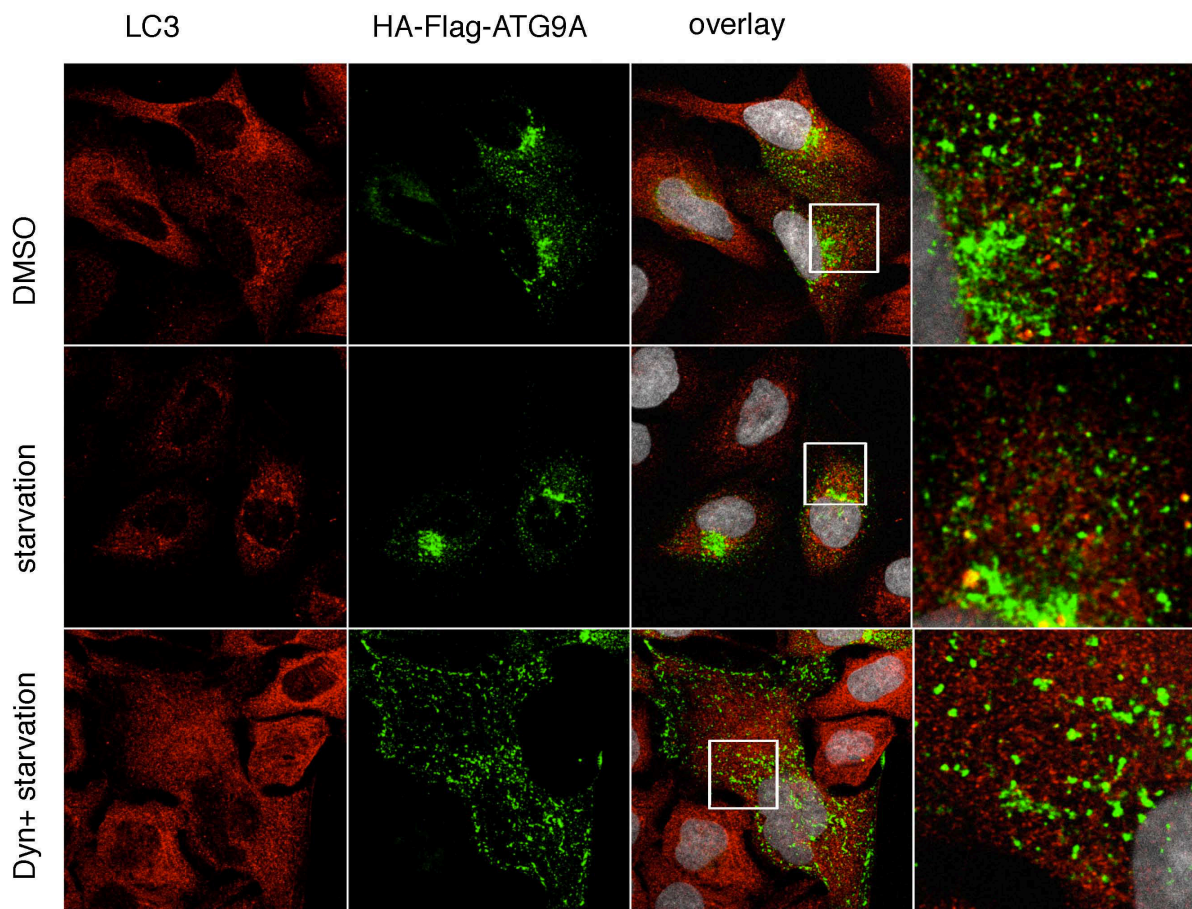

**Fig S8 | TBC1D5 and ATG9 co-localize upon inhibition of clathrin mediated endocytosis** (A) U2OS cells stably expressing HA-Flag-ATG9 were starved (EBSS) for 45 min. or pretreated with Dynasore for 15 min. (100  $\mu$ M) and subsequently starved for additional 45 minutes in combination with Dynasore. After fixation, cells were immune-labeled with anti-TBC1D5 and anti-HA antibodies, and analyzed on confocal microscope. (B) U2OS cells stably expressing HA-Flag-ATG9 were treated as described in (A), subsequently fixed and immune-labeled with anti-LC3 and anti-HA antibodies. Number of LC3 positive puncta was quantified and statistics is presented in Fig 5E.
