# Supplementary material
Source: PubMed Central journal article supplement (PMC3989670)
Supplement: embr0015-0392-sd21.pdf [file embr0015-0392-sd21.pdf]

**Movie S1. TBC1D5 and ATG9 co-localize in live cells.** Live cell imaging was performed on U2OS cells stably expressing GFP-ATG9A and mCherry-TBC1D5, frames were acquired every 5s, during period of 2,75 minutes.

**Movie S2. TBC1D5 and ATG9 co-localize in live cells during autophagy.** Live cell imaging was performed on U2OS cells stably expressing GFP-ATG9A and mCherry-TBC1D5, 1 hour after the treatment with KU0063794 started, frames were acquired every 5s, during period of 2,83 minutes. Movie represents plasma membrane region of the cell.

**Movie S3. TBC1D5 and ATG9 co-localize in live cells during autophagy.** Live cell imaging was performed on U2OS cells stably expressing GFP-ATG9A and mCherry-TBC1D5, 3 hours after the treatment with KU0063794 started, frames were acquired every 5s, during period of 3,91 minutes.

**Movie S4. ATG9 trafficks in small highly-mobile vesicles.** Live cell imaging was performed in U2OS cells stably expressing GFP-ATG9. Frames were acquired every 1s during the period of 1,58 minutes.

**Movie S5. ATG9 and TBC1D5 co-localize in static vesicles upon CME inhibition** Live cell imaging was performed on U2OS cells stably expressing GFP-ATG9A and mCherry-TBC1D5. Cells were imaged 5 minutes after Dynasore inhibitor was added, frames were acquired every 5s, during period of 4,58 minutes.
