# Supplementary material
Source: PubMed Central journal article supplement (PMC3989670)

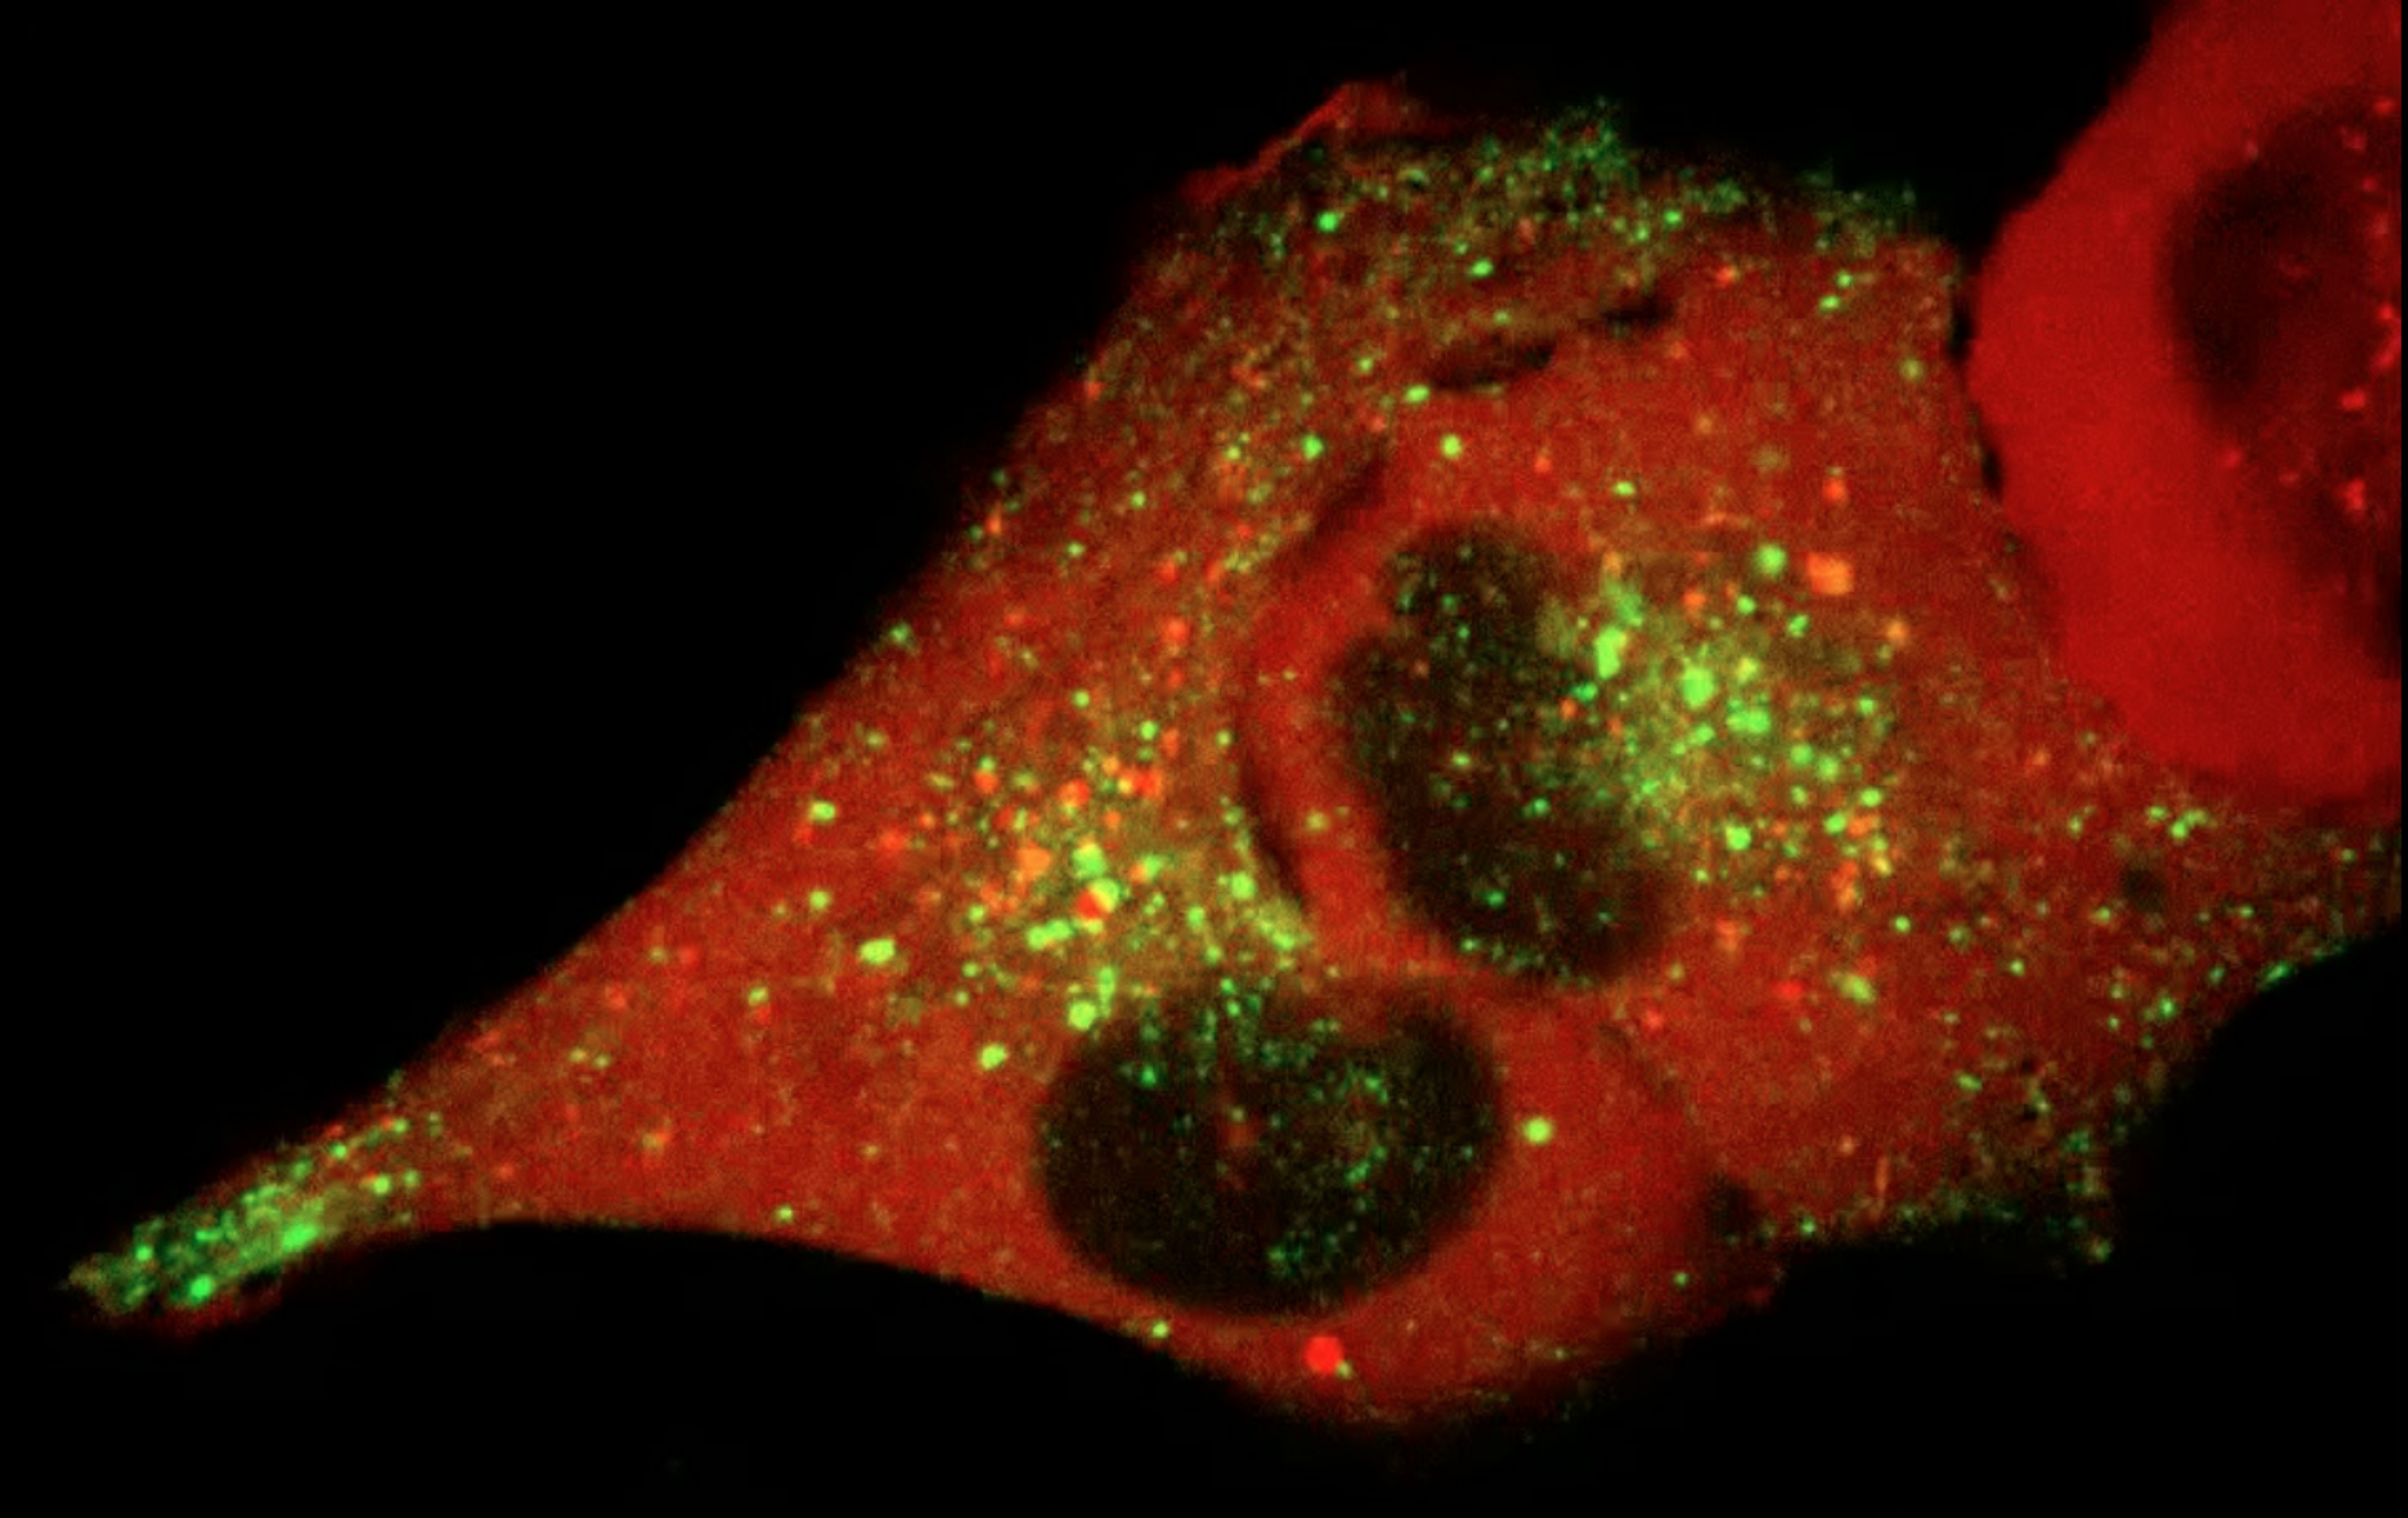

Supplement: embr0015-0392-sd11.pdf [file embr0015-0392-sd11.pdf]

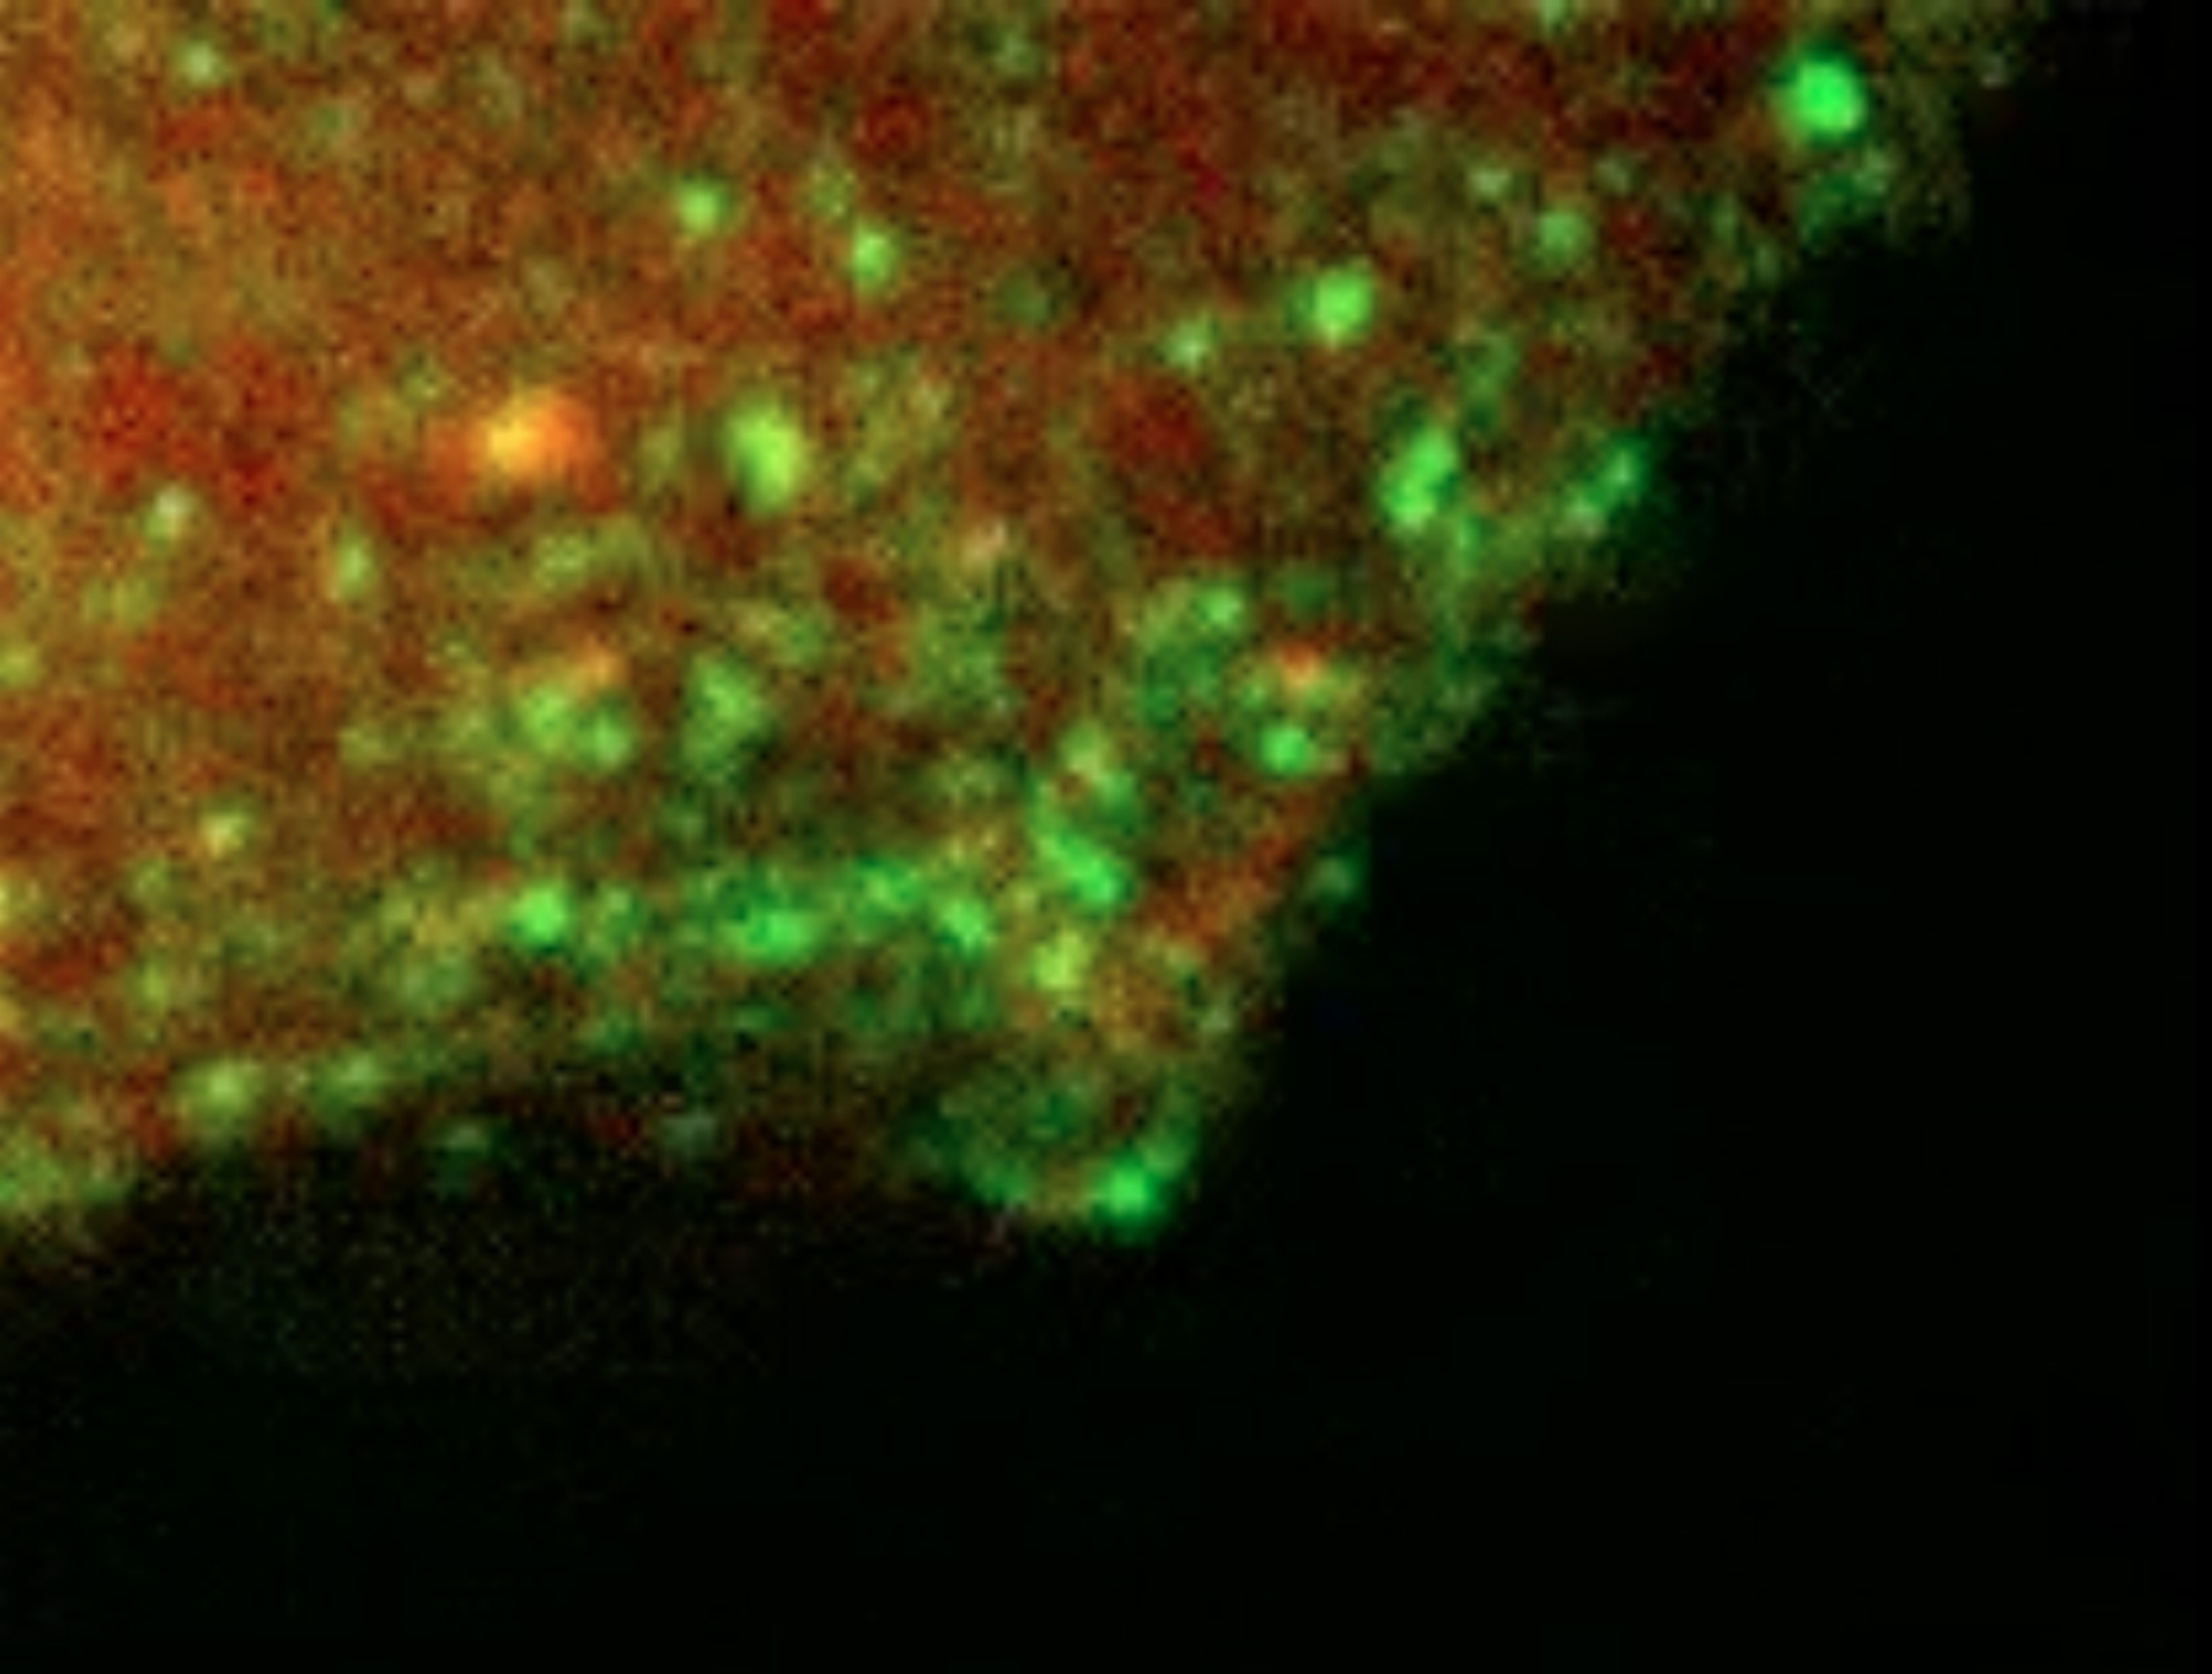

Supplement: embr0015-0392-sd13.pdf [file embr0015-0392-sd13.pdf]

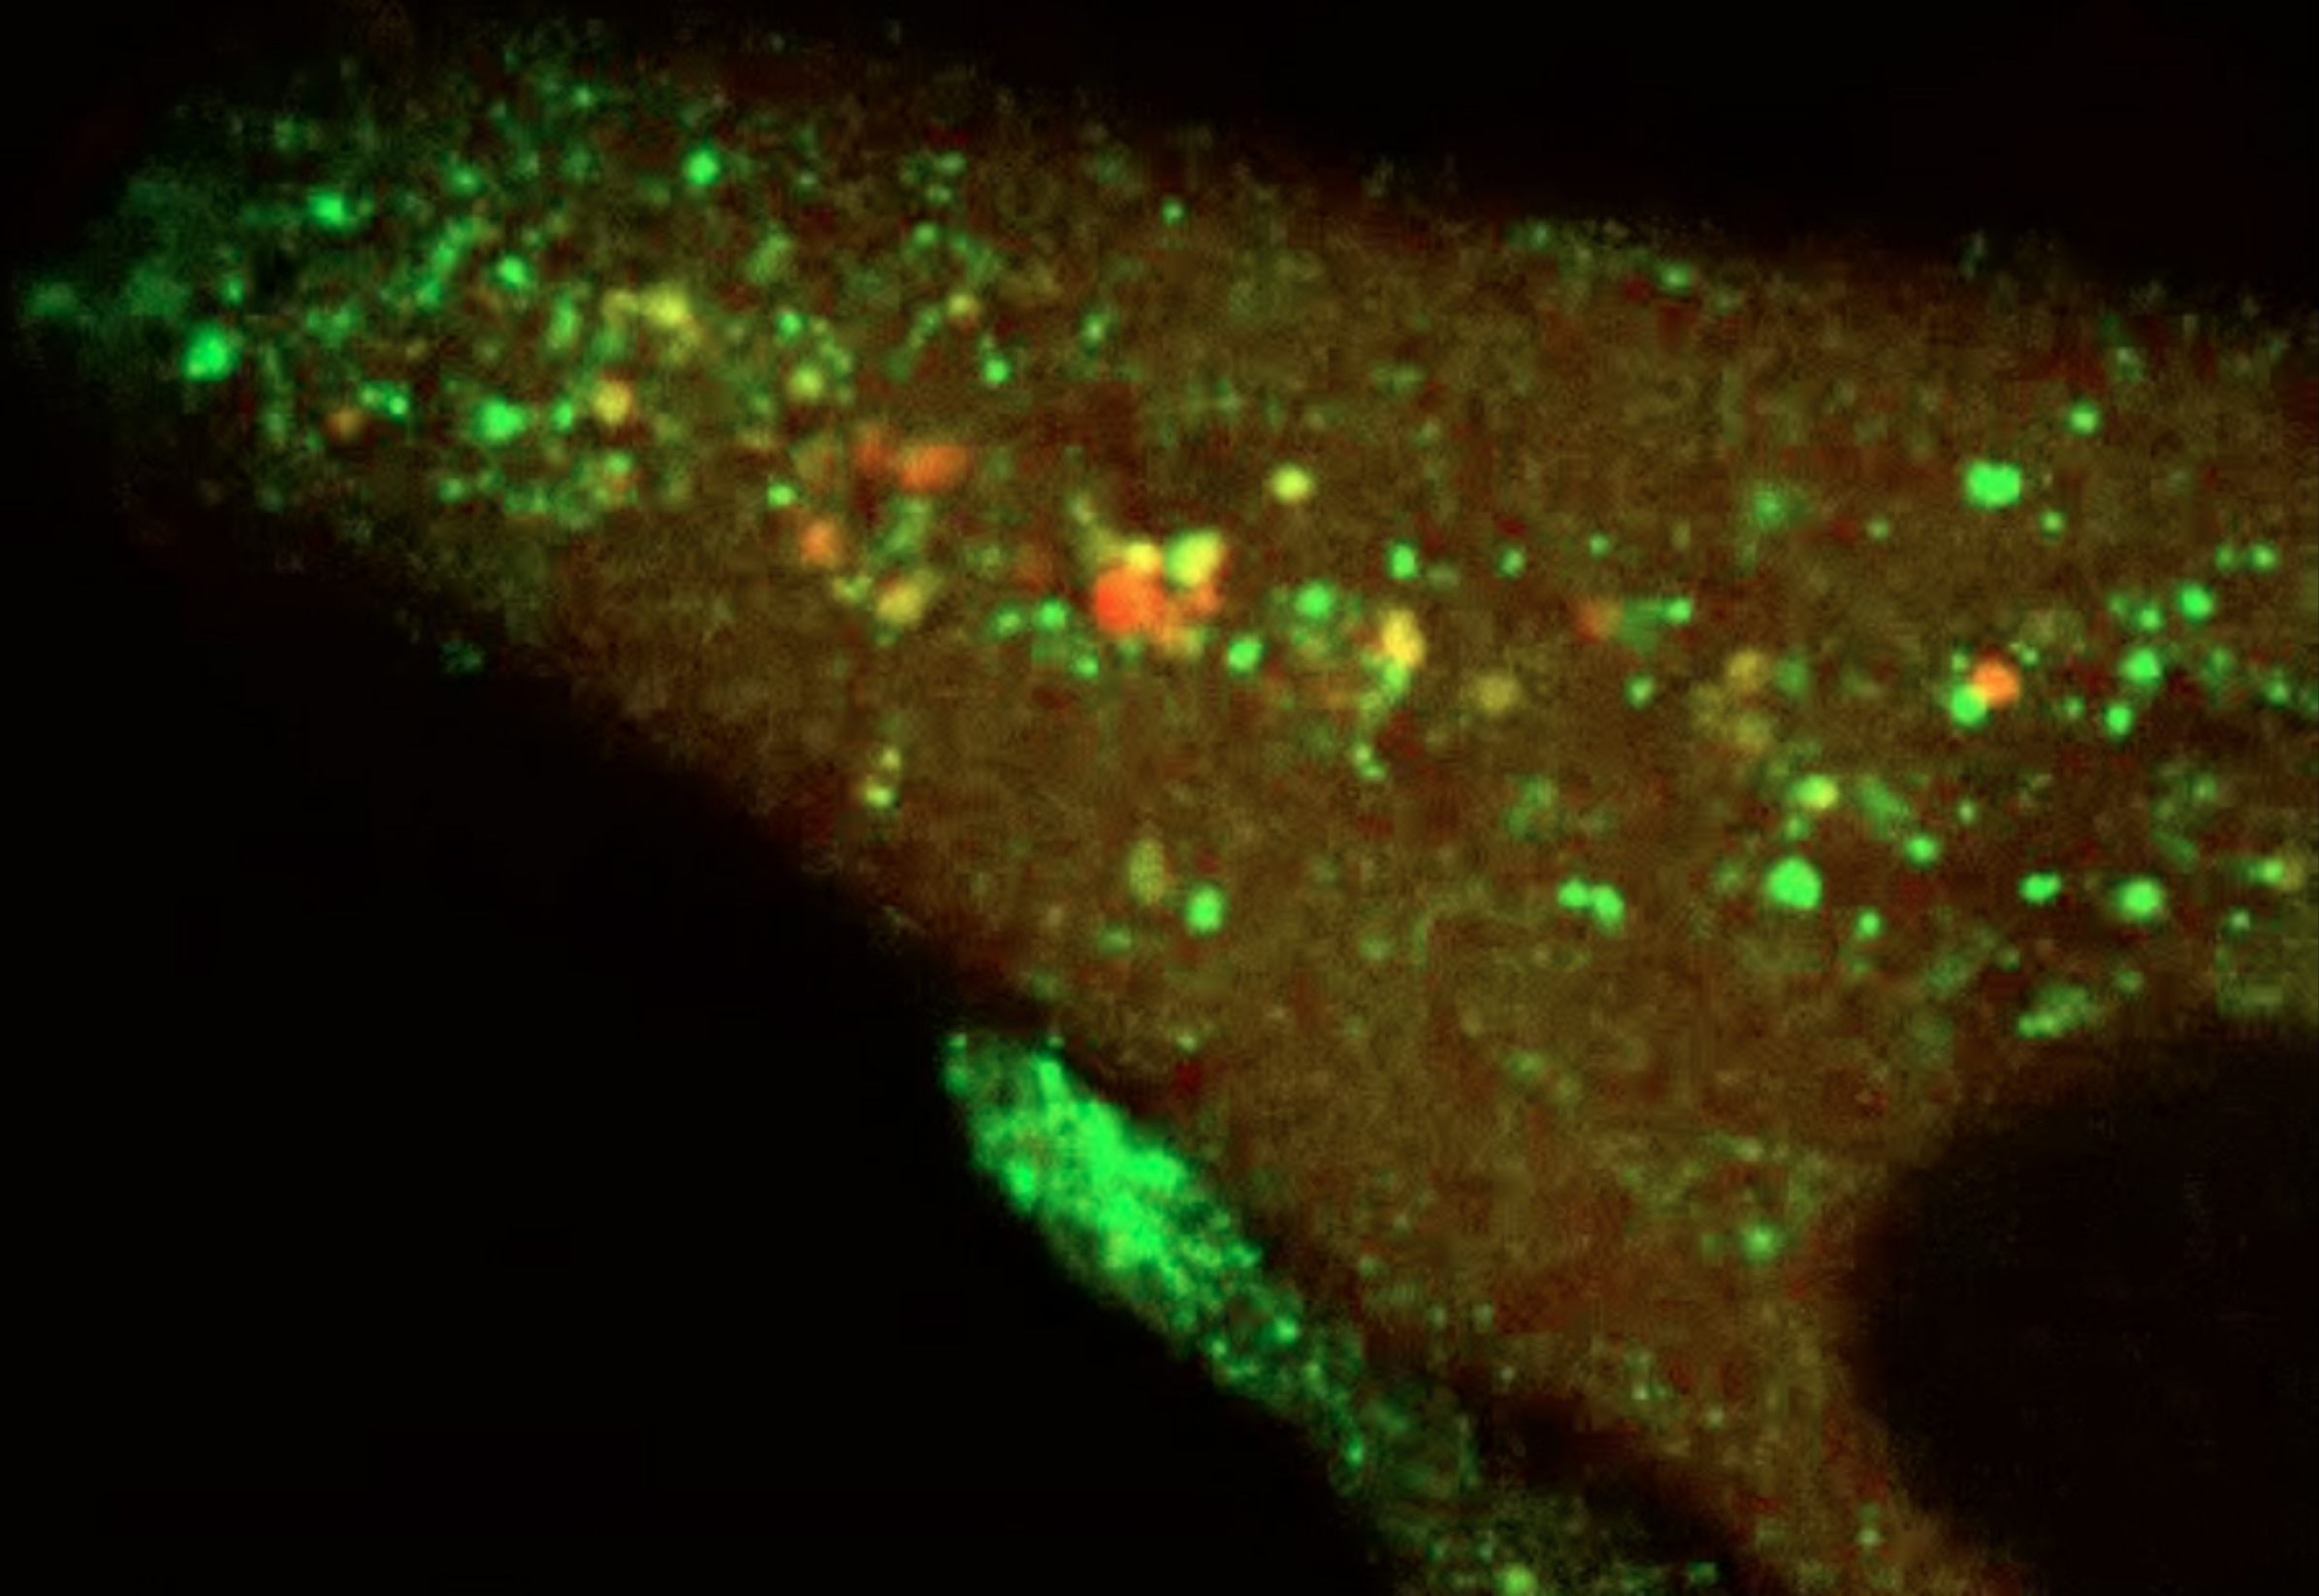

Supplement: embr0015-0392-sd15.pdf [file embr0015-0392-sd15.pdf]

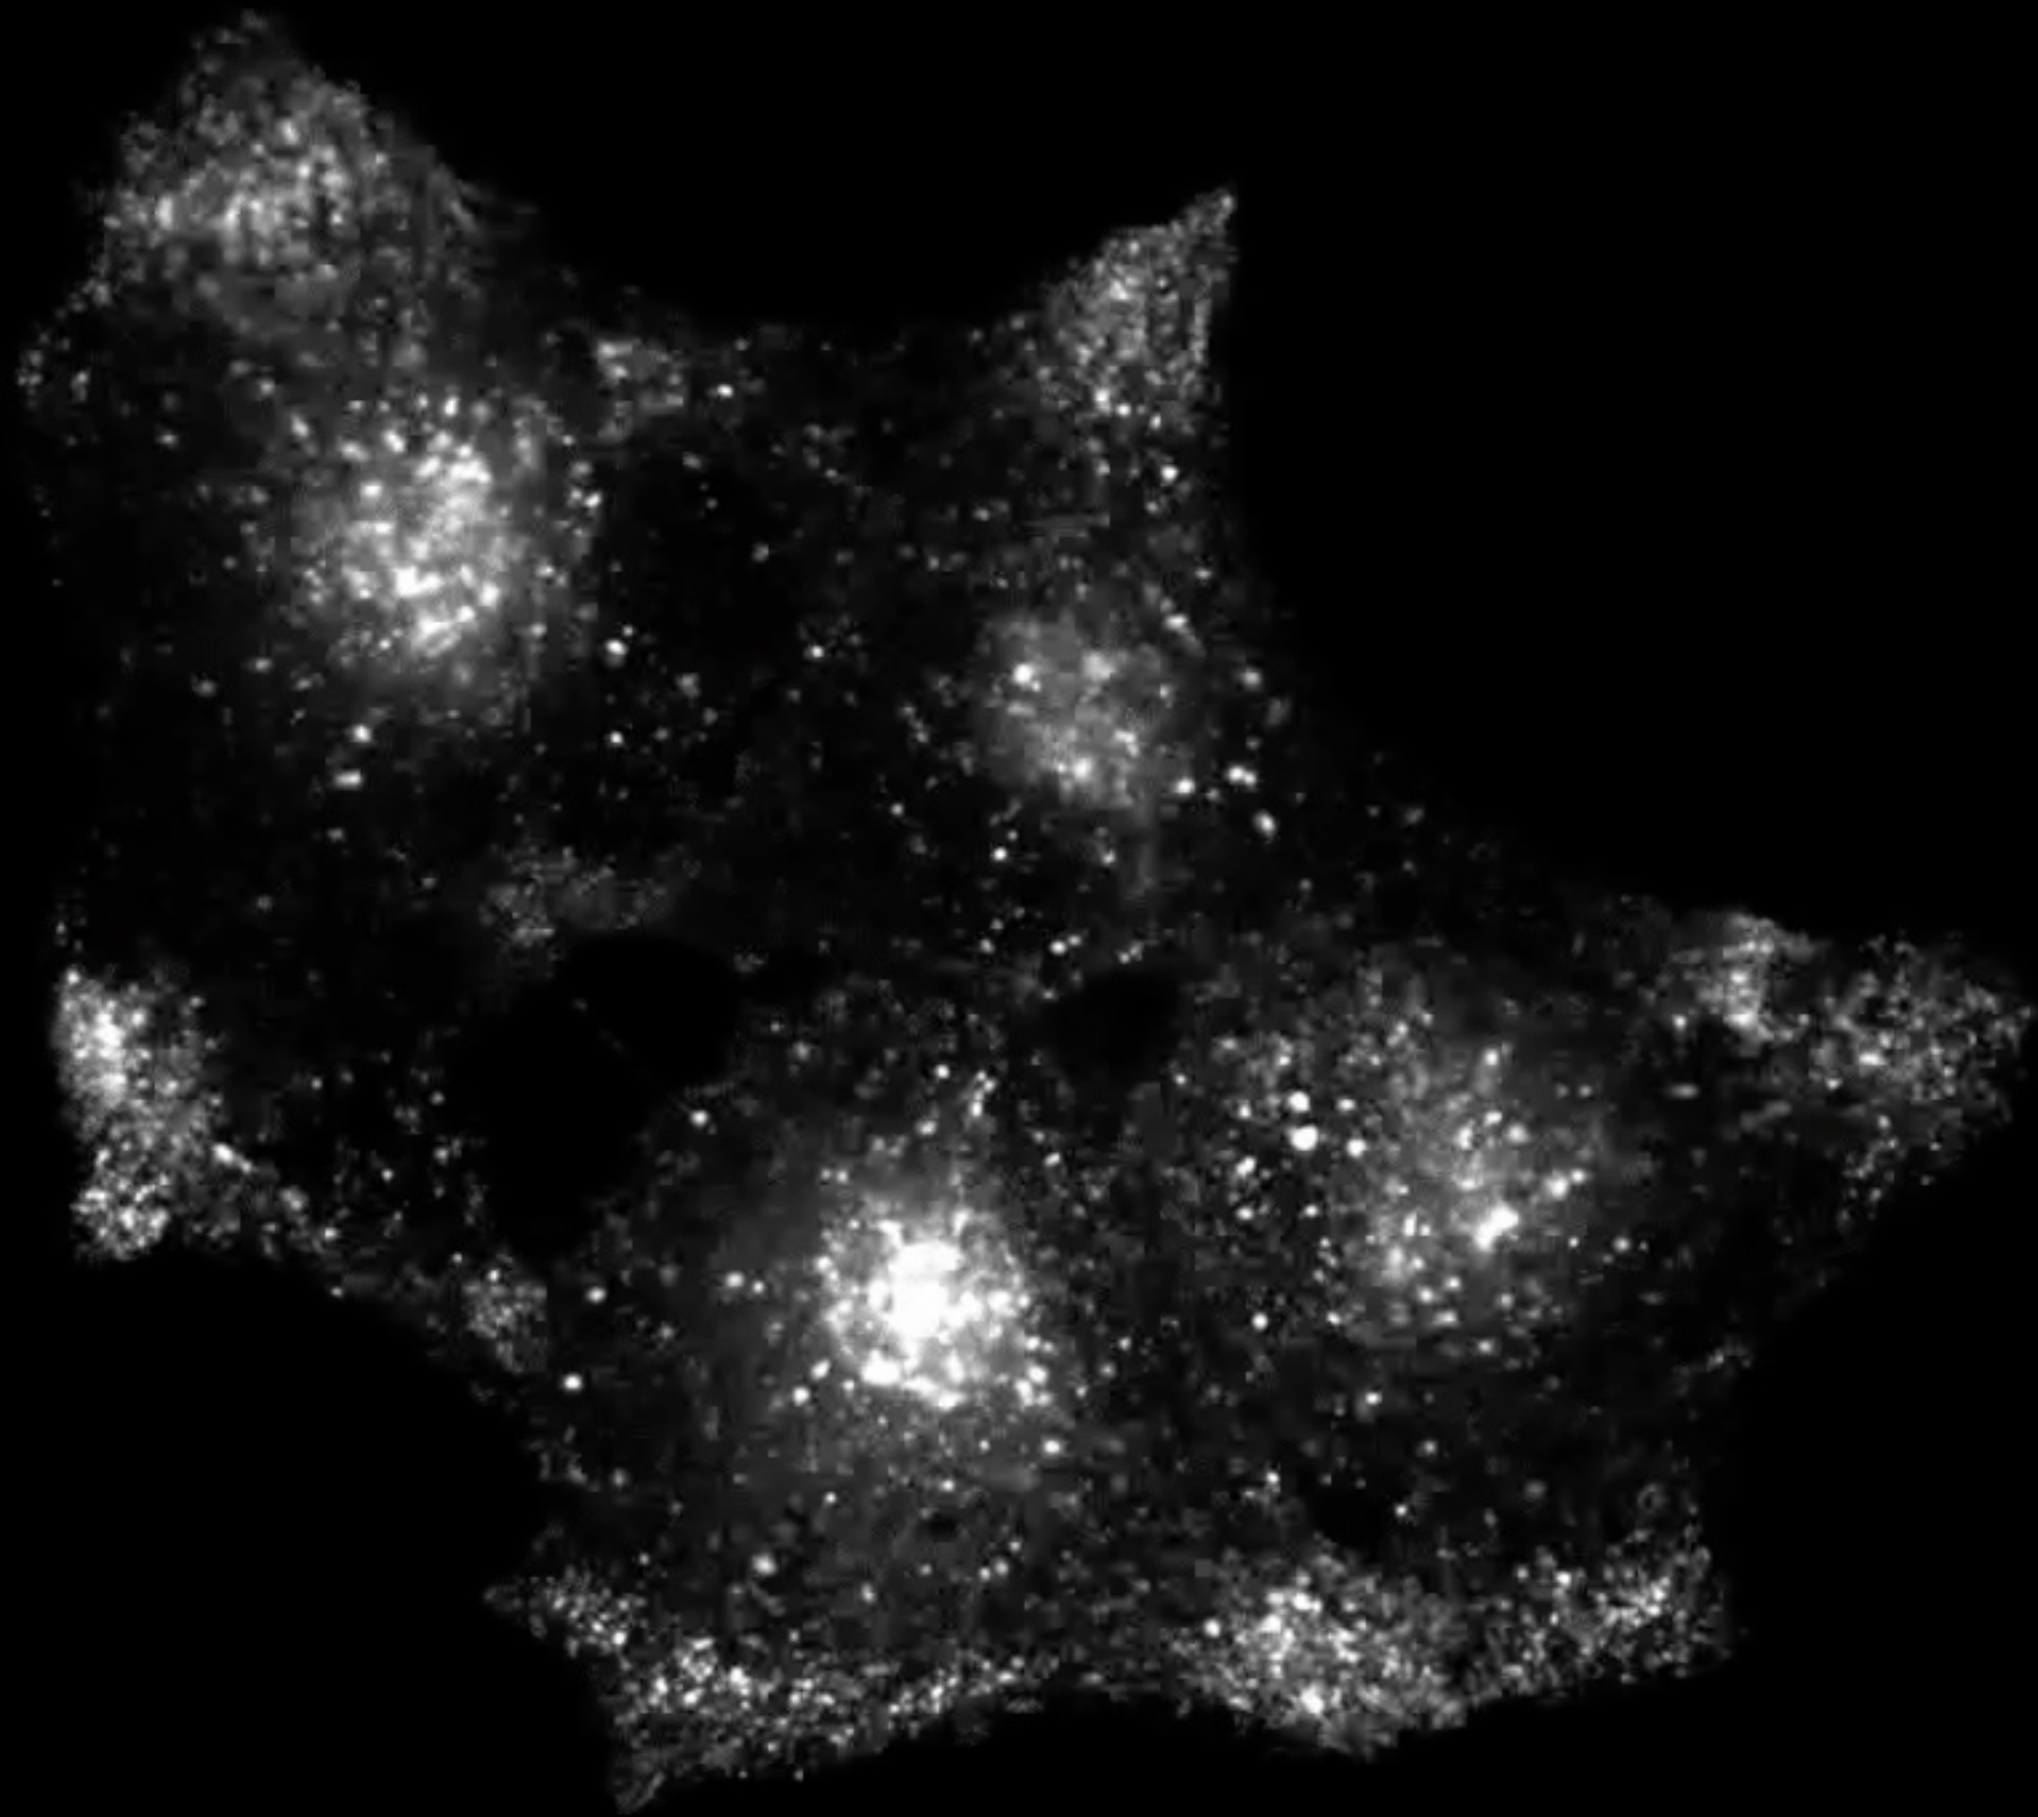

Supplement: embr0015-0392-sd17.pdf [file embr0015-0392-sd17.pdf]

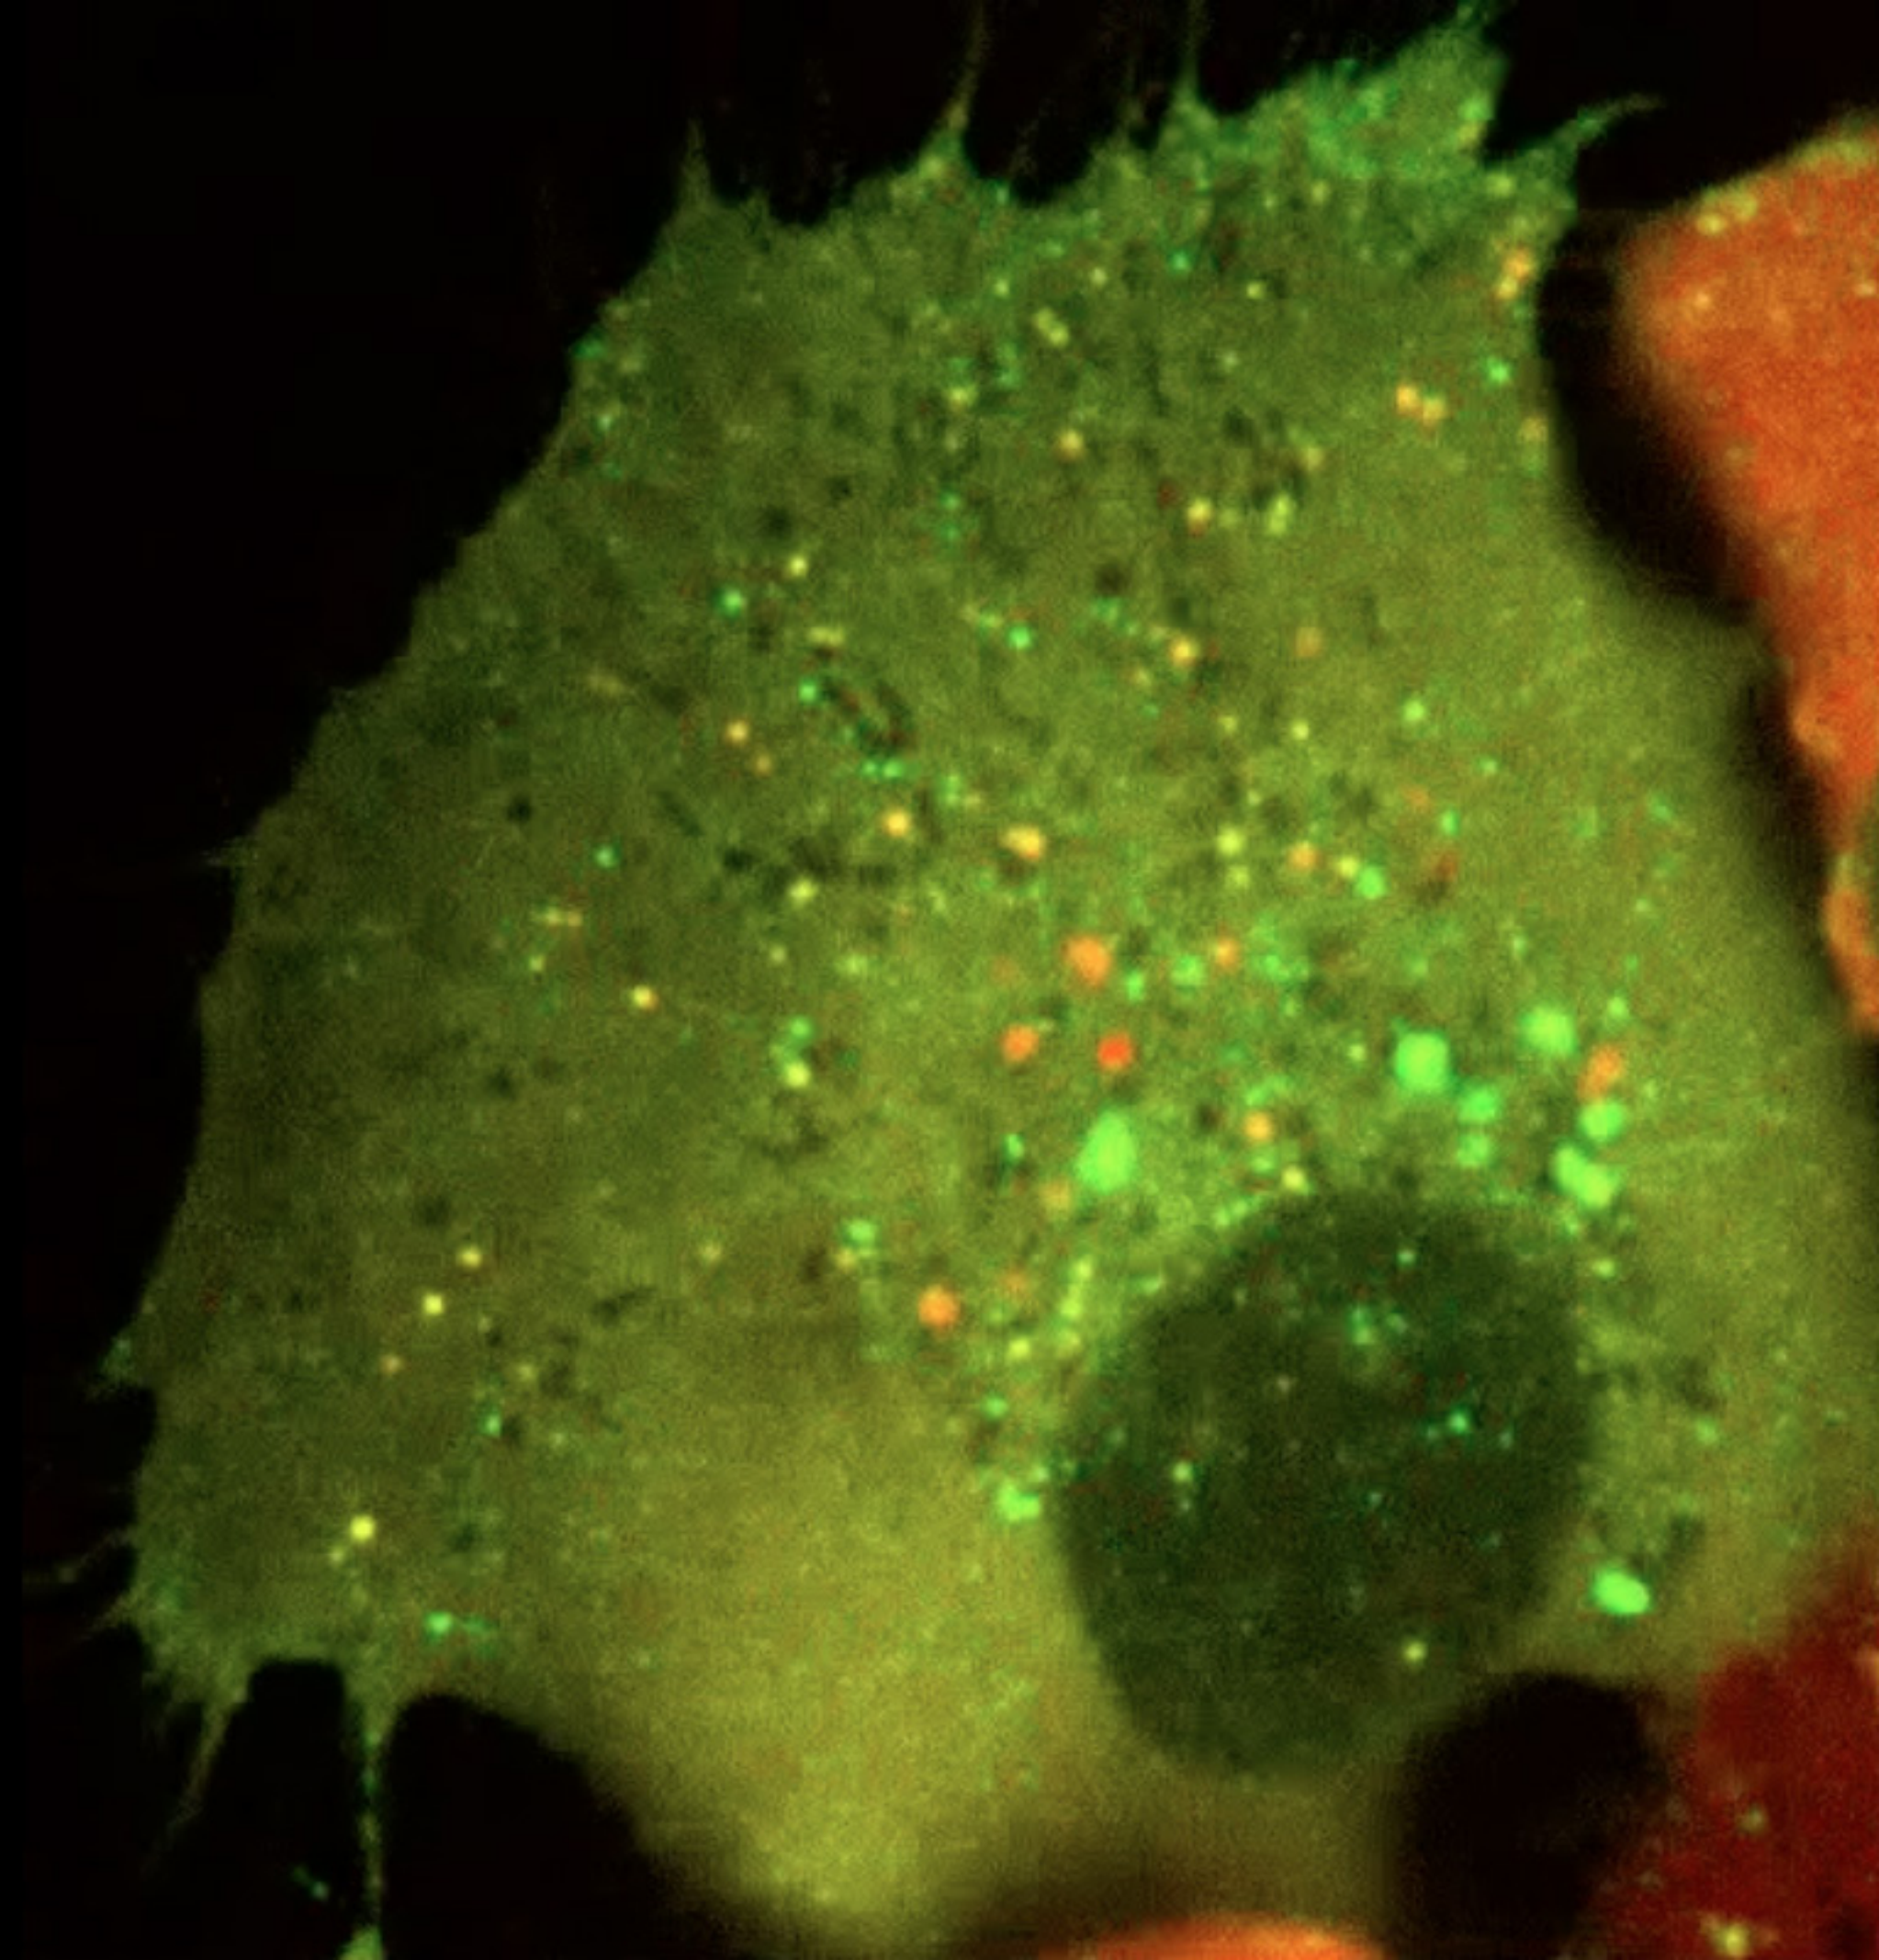

Supplement: embr0015-0392-sd19.pdf [file embr0015-0392-sd19.pdf]
